# Supplementary material for: Expression of PKM2 in wound keratinocytes is coupled to angiogenesis during skin repair in vivo and in HaCaT keratinocytes in vitro
Source: PubMed Central journal article supplement (PMC9977898; doi:10.1007/s00109-022-02280-6), 2023-01-12

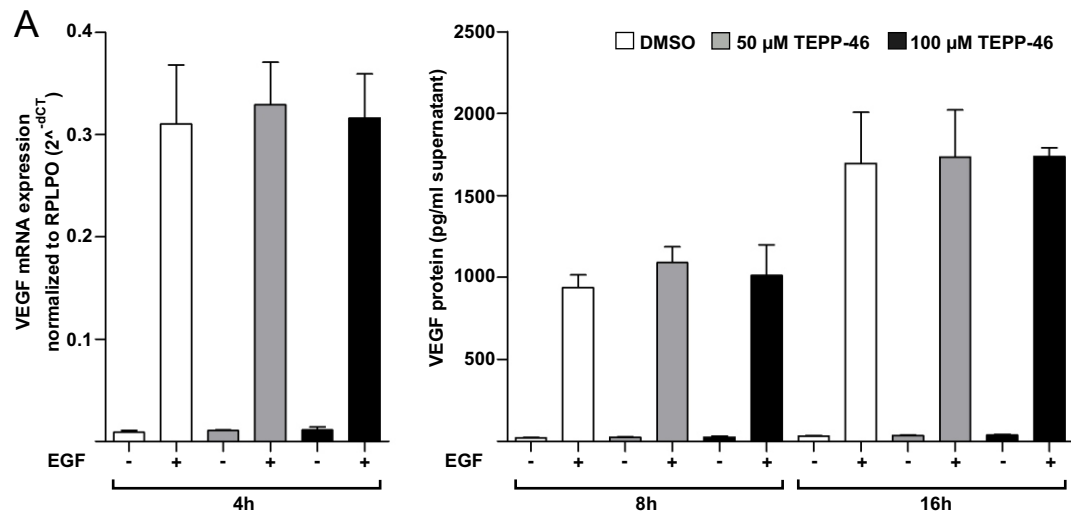

Supplementary Figure S7

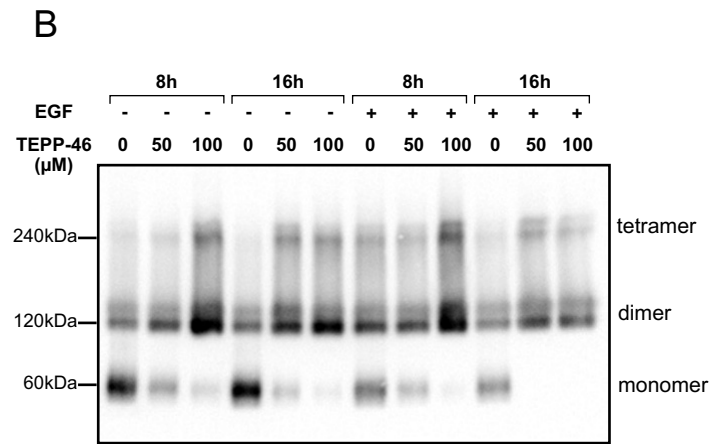

Supplement: 109_2022_2280_MOESM7_ESM.pdf [file 109_2022_2280_MOESM7_ESM.pdf]
